# Supplementary material for: Activation of epithelial and inflammatory pathways in adolescent elite athletes exposed to intense exercise and air pollution
Source: PubMed Central journal article supplement — Thorax. 2023 Mar 16;78(8):775–83. doi: 10.1136/thorax-2022-219651 (PMC10359548; doi:10.1136/thorax-2022-219651), 2023-03-16
Supplement: thorax-2022-219651supp001.pdf [file thorax-2022-219651supp001.pdf]

**TITLE: Activation of epithelial and inflammatory pathways in adolescent elite athletes exposed to intense exercise and air pollution**

**AUTHORS:** Janne Goossens<sup>1</sup>; Anne-Charlotte Jonckheere<sup>1</sup>; Ellen Dilissen<sup>1</sup>; Sven F Seys<sup>1</sup>; Tatjana Decaestecker<sup>1</sup>, Camille Goossens<sup>1</sup>; Koen Peers<sup>2</sup>; Vincent Vanbelle<sup>3</sup>; Jeroen Stappers<sup>4</sup>; Sven Aertgeerts<sup>5</sup>; Jasmine Leus<sup>6,7</sup>; Sophie Verelst<sup>7,8</sup>; Marc Raes<sup>7,8</sup>; Lieven Dupont<sup>9,10</sup>; Dominique M Bullens<sup>1,7</sup>

**Online Data Supplement**

## Supplementary Material and methods

### *RNA isolation, cDNA synthesis, qPCR*

RNA isolation was performed with the Mini RNeasy kit (Qiagen, Hilden, Germany) according to the manufacturer's guidelines. Afterwards, RNA concentration and quality were measured with Nanodrop (Thermo Scientific, Waltham, USA). cDNA was synthesized with the High Capacity cDNA Reverse Transcription Kit (Applied biosystems, Waltham, USA) with adapted protocol for low concentration of RNA. Sputum levels (CCL3, CHIT1, CLDN1, CLDN15, IL1A, IL1B, IL6, IL8, IL17A, IL17F, IFNG, OCLN, TJP1, TNF) were measured using real time qPCR.[1–5] Data was normalized to the geometric mean of the reference genes PPIA and RPL13A, determined with RefFinder.[6] Newly developed primers and probes are listed in supplementary table E1. cDNA plasmid standards were used to quantify the amount of target gene in unknown samples.[7]

### *RNA-Seq library preparation and sequencing*

Additional RNA column purification analysis (Qiagen, Hilden, Germany) was performed on samples to increase the number of samples available for RNA-Seq. RNA libraries were constructed using QuantSeq 3' mRNA library prep kit (Lexogen, Vienna, Austria). A protocol modification for low input/quality RNA was performed on samples with RNA <75-100ng (5µl or 15-20ng/µl) and/or RIN-value <5, according to manufacturer's

guidelines (Lexogen, Vienna, Austria). Samples were indexed to allow for multiplexing. Library quality and size range was assessed using a Bioanalyzer (Agilent Technologies, California, USA) with the DNA 1000 kit (Agilent Technologies, California, USA). Sequencing was performed using the HiSeq 4000 (Illumina, San Diego, USA). Single-end reads of 50 bp length were produced with a minimum of 1M reads per sample.

*Bioinformatics processing of RNA-Seq data and differential gene expression analysis*

Quality control of raw reads was performed with FastQC v0.11.7, available online at: <http://www.bioinformatics.babraham.ac.uk/projects/fastqc>. Adapters were filtered with ea-utils fastq-mcf v1.05[8]. Splice-aware alignment was performed with HiSAT2 against the human reference genome hg38, Ensembl83. Reads mapping to multiple loci in the reference genome were discarded. Resulting BAM files were handled with Samtools v1.5.[9] Quantification of reads per gene was performed with HT-seq Count v2.7.14. Samples containing <700.000 reads were removed for further analysis. Count-based differential expression analysis was done with R-based Bioconductor package DESeq2.[10] Reported p-values were adjusted for multiple testing with the Benjamini-Hochberg procedure, which controls false discovery rate (FDR). Mean normalised counts <5 were removed to correct for low base mean expression.

For canonical pathway analysis the Ingenuity Pathway Analysis (IPA) (Qiagen, Valencia, CA) was used using the gene list of differentially expressed genes (DEGs).

Gene Set Enrichment Analysis (GSEA) was performed with GSEA software (MSigDbv6, Broad Institute) using the full gene lists with normalized reads.

#### *Serum and sputum supernatant biomarker analysis*

Serum clara cell protein 16 (CC16) was quantified by ELISA (Biovender, Czech Republic). Serum (1:20 dilution) and sputum supernatant (1:5 dilution) uric acid levels, were determined with the Amplex Red uric acid/uricase assay kit from Invitrogen (Thermo Fisher scientific, Waltham, USA). Surfactant protein D (SpD) levels in undiluted sputum supernatant samples were measured by ELISA (R&D systems, Minneapolis, USA). Human high mobility group protein B1 (HMGB1) levels were analysed in undiluted sputum supernatant samples (Abxexa, Cambridge, UK). Substance P was measured using a human substance P ELISA, with sputum supernatant samples diluted 1:2 (Cayman Chemical, Michigan, USA). Calprotectin levels in sputum supernatant samples (1:20 dilution) were analysed using a calprotectin ELISA kit (CALPRO AS, Lysaker, Norway). All assays were performed according to manufacturers' guidelines.

## Supplementary results

### Upper and lower airway symptoms

Different symptoms related to upper and lower airway disease, both outside and during exercise, were evaluated with the help of a previously reported questionnaire [1,11]. The most reported lower airway symptom during exercise was shortness of breath (Figure E5). Approximately 43% of swimmers (n=6), 36% of volleyball players (n=4), 26% of football players (n=10), 21% of basketball players (n=5) and even 48% of control subjects (n=12) reported shortness of breath during exercise. Wheezing during exercise, which has been described to be associated with a positive EVH test, was most reported in swimmers (22%, n=3). Consistently, swimmers reported higher use of respiratory medication (n=9) (table E6). Similarly, swimmers reported most upper respiratory symptoms during exercise (Figure E6). Six athletes self-reported a positive history of EIB/asthma.

### Explorative comparison between EIB+ and EIB- athletes

RNA-Seq analysis of two atopic EIB+ athletes compared to 4 matched atopic EIB- athletes was performed (table E3). (The other sputum samples from EIB+ subjects did not allow further analysis due to quality issues, hence we decided to study atopic subjects only). The PCA plot showed 2 clear separate populations (Figure E5). After correction for multiple testing, 372 genes with an effect size of 0.05 were significantly

differentially expressed between EIB+ and EIB- athletes (271 up- and 101 downregulated, Figure 5C, table E4). IPA analysis, identified increased pathways for oxidative signalling and neuroinflammation for EIB+ athletes compared to EIB- athletes (Figure E5). Other pathways associated with the DEGs included interferon signalling, tight junction and gap junction signalling. Enrichment analysis confirmed the role of oxidative and type I IFN- $\alpha$  response in EIB+ athletes (Figure E5).

### **Effect of air pollution on transcriptome**

To investigate the effect of air pollution on the airway transcriptome of athletes, we performed differential expression analysis based on the exposure level of the athletes to each air pollutant; PM<sub>2.5</sub> <10  $\mu\text{g}/\text{m}^3$  (low) vs >25  $\mu\text{g}/\text{m}^3$  (high), PM<sub>10</sub> <20  $\mu\text{g}/\text{m}^3$  (low) vs 20-50  $\mu\text{g}/\text{m}^3$  (immediate) (no values above threshold of 50  $\mu\text{g}/\text{m}^3$ ) and O<sub>3</sub> <50  $\mu\text{g}/\text{m}^3$  (low) vs 50-100  $\mu\text{g}/\text{m}^3$  (immediate) (no values above threshold of 100  $\mu\text{g}/\text{m}^3$ ), respectively (Figure E7). The training hours a week and training years did not differ amongst the different sport disciplines (table 1). In addition, the transcriptomic profiles did not differ amongst the different sport disciplines (table E8). Athletes exposed to higher levels of PM<sub>2.5</sub> (n=4), significantly expressed more CHIT1, a marker of activated human macrophages, compared to athletes exposed to low levels of PM<sub>2.5</sub> (n=12) (Figure E7, E8). The downregulated genes in this group included MUC1, MUC4 and ECM1 (table E9). In contrast, the differential expression analysis based on PM<sub>10</sub>, low

(n=22) versus immediate (n=23) revealed only 2 differentially expressed genes namely FOLR3 and KRT80 (Figure E7). There were no genes differentially expressed in athletes exposed to low (n=18) compared to immediate O<sub>3</sub> levels (n=27) (Figure E7). In addition, air pollution exposure is known to induce epithelial barrier dysfunction. We found a trend towards elevated CC16 serum levels in the group of athletes exposed to higher levels of PM<sub>2.5</sub> (n=4) compared to athletes exposed to low levels of PM<sub>2.5</sub> (n=12) (p=0.0557) (Figure E7). Another DAMP released from ischemic tissues and dying cells, serum uric acid levels, significantly correlated with the concentration O<sub>3</sub> (p=0.0002, r=0.3847) at lag 0 (Figure E7). Also, sputum IL-17F mRNA levels correlated with O<sub>3</sub> concentration at lag 0 (p= 0.0369, r= 0.3231).

## Supplementary discussion

### Preliminary comparison EIB+ and EIB- athletes

Our RNA-Seq analysis studying differences between EIB- atopic athletes and EIB+ atopic athletes should be considered 'exploratory' due to the low sample numbers available. Nevertheless, it reveals interesting suggestions concerning the underlying mechanisms of EIB pointing to oxidative stress and data will be provided in open access to allow analysis over different cohorts. Oxidative stress induces mitochondrial damage, can activate nuclear factor (NF)- $\kappa$ B, which is known to play a critical role in mediating immune and inflammatory responses and apoptosis.[12] Elite sport activities already have been described as stimulus able to induce oxidative stress,[13] but our study suggests a link with EIB. Further research should furthermore focus on oxidative stress especially in the airways of EIB+ athletes. We here furthermore suggested activation of the neuroinflammation signalling pathway in EIB+ athletes. Neuropeptides such as substance P and neurokinin A are also described by others to be involved in EIB.[14] We found an association of the gene set comprising genes up-regulated in response to IFN- $\alpha$  with EIB+ athletes. Recent studies have demonstrated that IFN- $\alpha$  negatively regulates Th2 function, suggesting a protective role. However, recent viral infections, which may also trigger EIB, may also be responsible for this observed upregulation in EIB+ athletes.



## Supplementary figures

Figure E1. Flow diagram sputum sampling

Figure E2. One-week and one-month average BC exposure in controls vs athletes

Figure E3. Validation qPCR controls vs athletes

Figure E4. qPCR cytokines controls vs athletes

Figure E5. Transcriptome profiling of induced sputum samples in EIB- and EIB+ athletes.

Figure E6. Self-reported upper and lower airway symptoms

Figure E7. Transcriptomic differences in athletes based on air pollution exposure

Figure E8. Validation qPCR CHIT1

**Supplementary tables**

Table E1: Primer and probe sequences for qPCR

Table E2: Top 20 genes differentially expressed controls versus athletes

Table E3: Characteristics athletes used for comparison EIB- versus EIB+ athletes

Table E4: Top 20 genes differentially expressed EIB- versus EIB+

Table E5: Correlation table

Table E6: Overview medication use

Table E7: EIB+ subjects

Table E8: Differential expression analysis between sport disciplines

Table E9: Top 20 genes differentially expressed PM2.5 low exposure (<10 µg/m<sup>3</sup>) versus PM2.5 high exposure (>25 µg/m<sup>3</sup>)

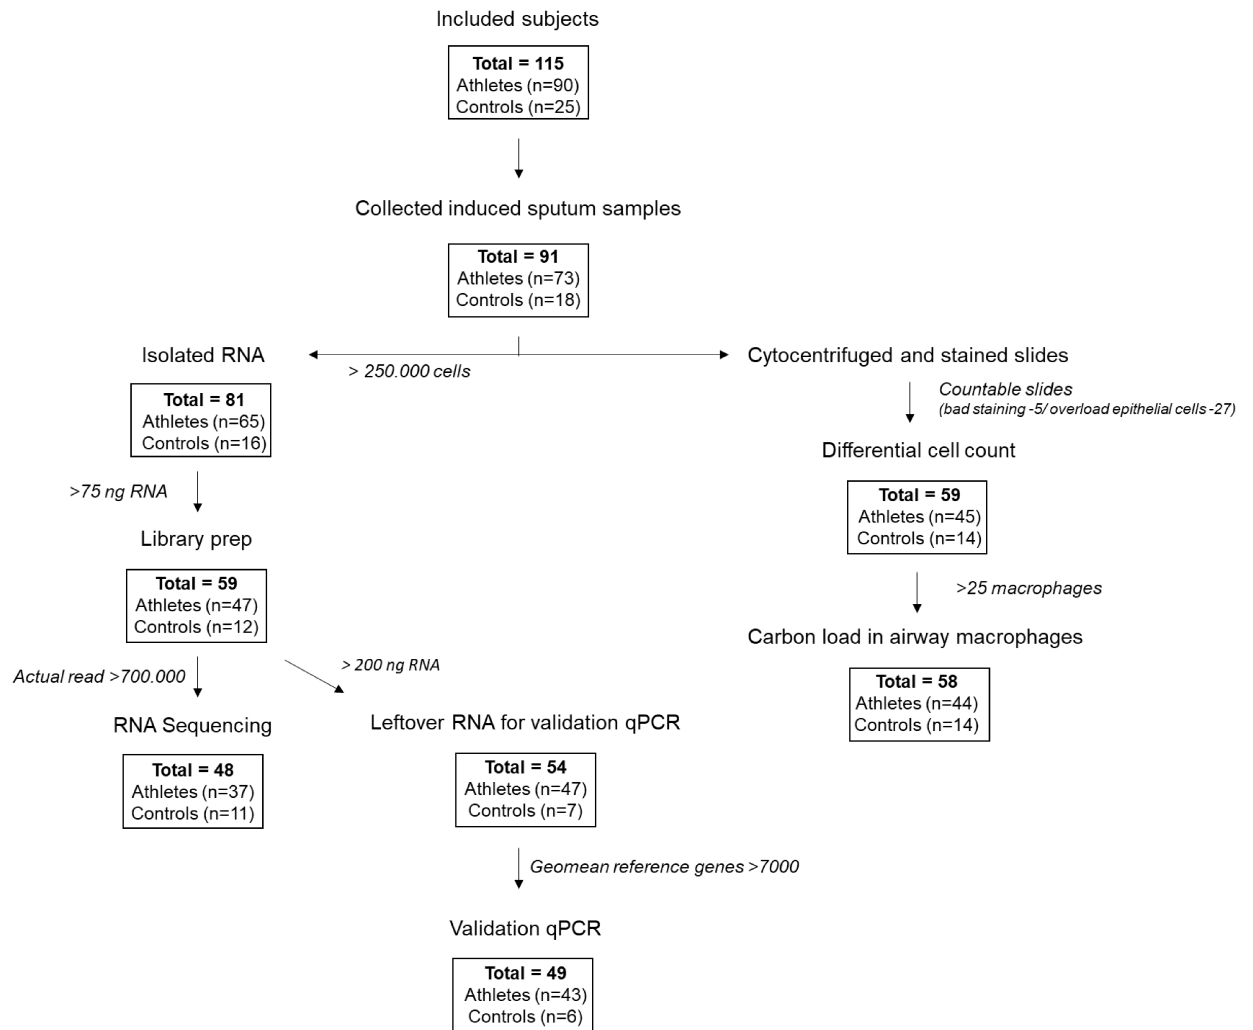

Figure E1. Flow diagram sputum sampling

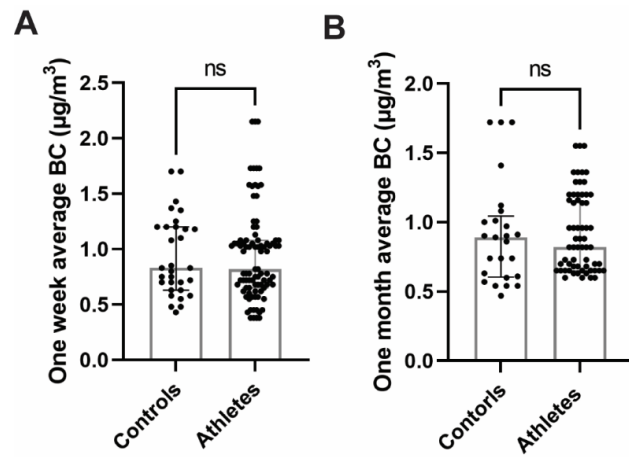

**Figure E2: One-week and one-month average BC exposure in controls vs athletes**

Comparison of one week (A) and one-month (B) average BC ( $\mu\text{g}/\text{m}^3$ ) between controls and athletes. (Mann-Whitney test)

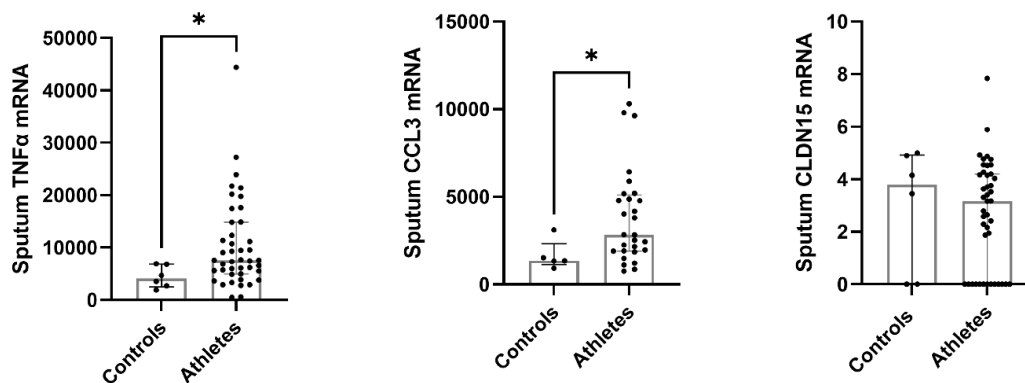

**Figure E3: Validation qPCR controls vs athletes**

Remaining RNA for controls (n=6) and athletes (n=43) was used to validate obtained results via qPCR. (Mann-Whitney test) \*p<0.05.

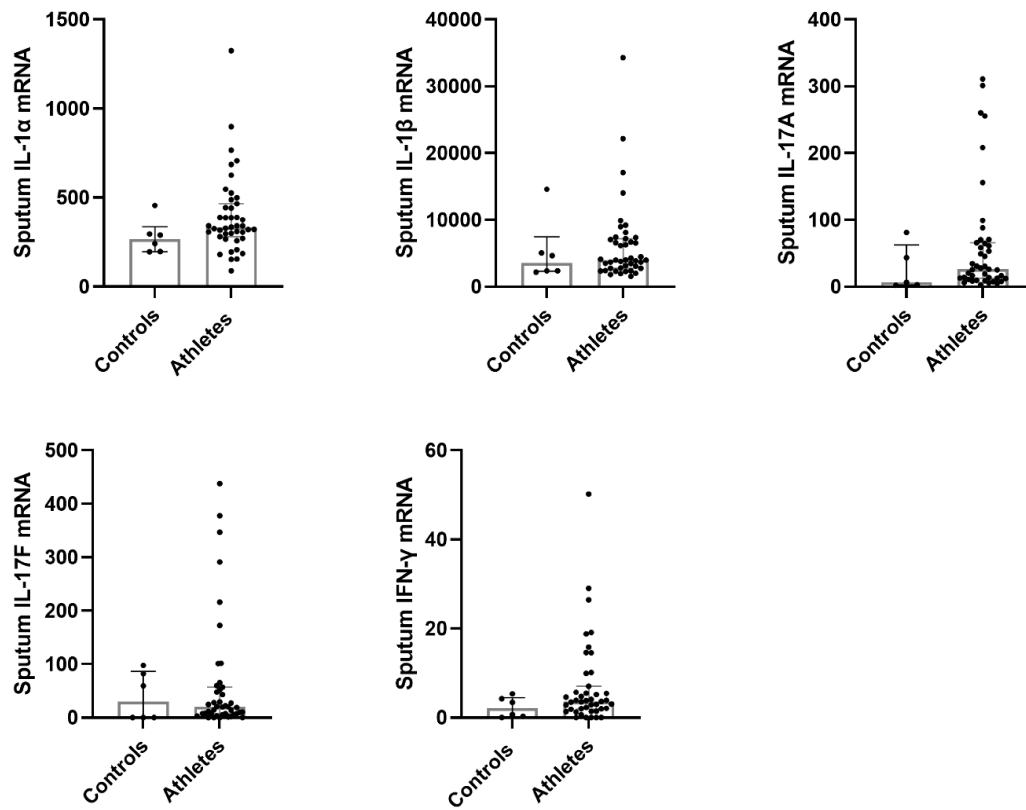

**Figure E4: qPCR cytokines controls vs athletes**

Remaining RNA for controls (n=6) and athletes (n=43) was used to study the cytokine profile in controls vs athletes via qPCR. (Mann-Whitney test)

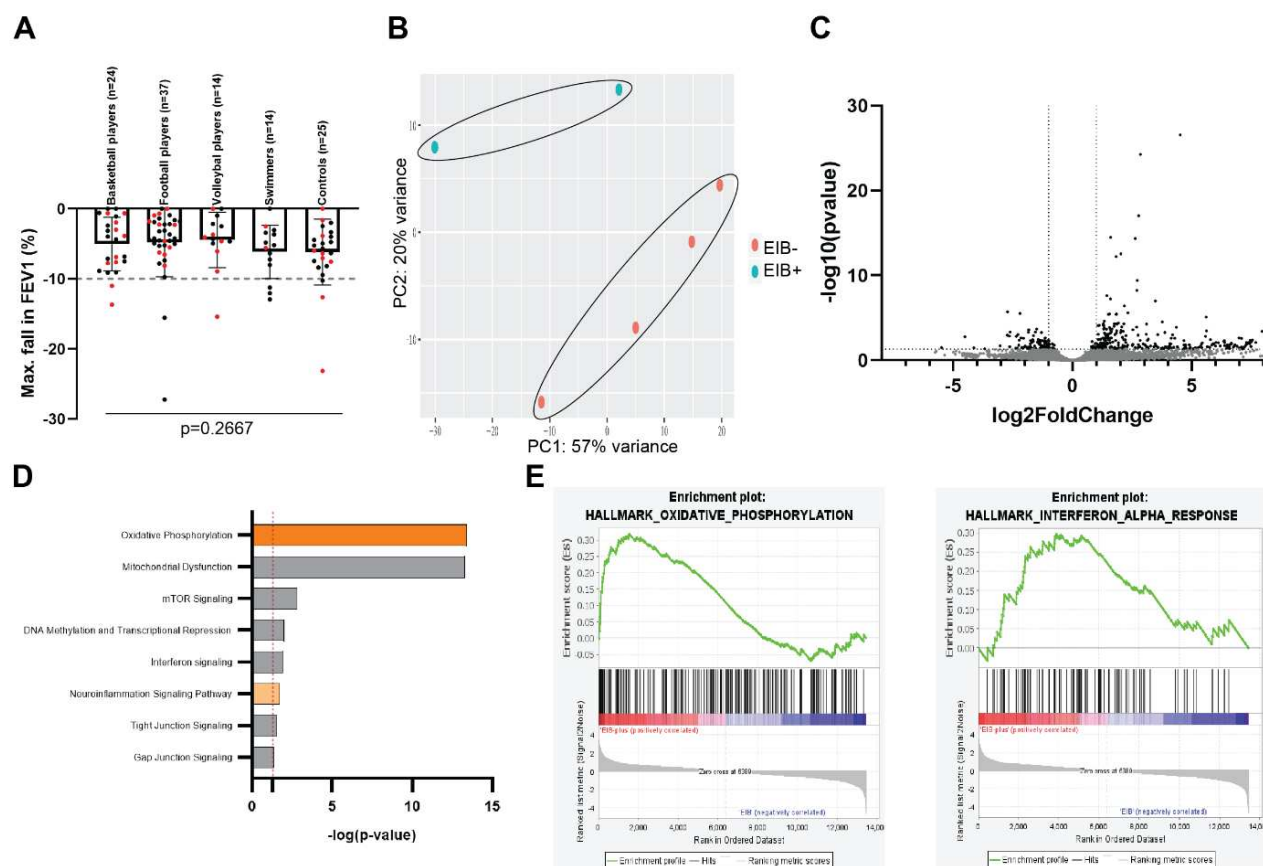

**Figure E5: Transcriptome profiling of induced sputum samples in EIB- and EIB+ athletes. (A)** EVH test was completely performed in basketball players (n=24), football players (n=37), volleyball players (n=14), swimmers (n=14) and control subjects (n=25). The test was considered positive if a drop in FEV  $\geq 10\%$  was observed on at least one time point after the EVH test. Red dots represent atopic subjects. (Kruskal-Wallis test) **(B)** Principal-component analysis (PCA) plots of EIB+ athletes (blue) and EIB- athletes (red). **(C)** Volcano plot with the magnitude expressed as log2 fold change (x axis) and significance expressed as  $-\log_{10}$  of the adjusted p value (y axis) of differential expression analysis. **(D)** Selected significantly enriched or downregulated

pathways based on IPA analysis listed according their p value. Orange bars: positive z-score; grey bars: no activity pattern available **(E)** Significant enrichment plots at FDR < 25%.



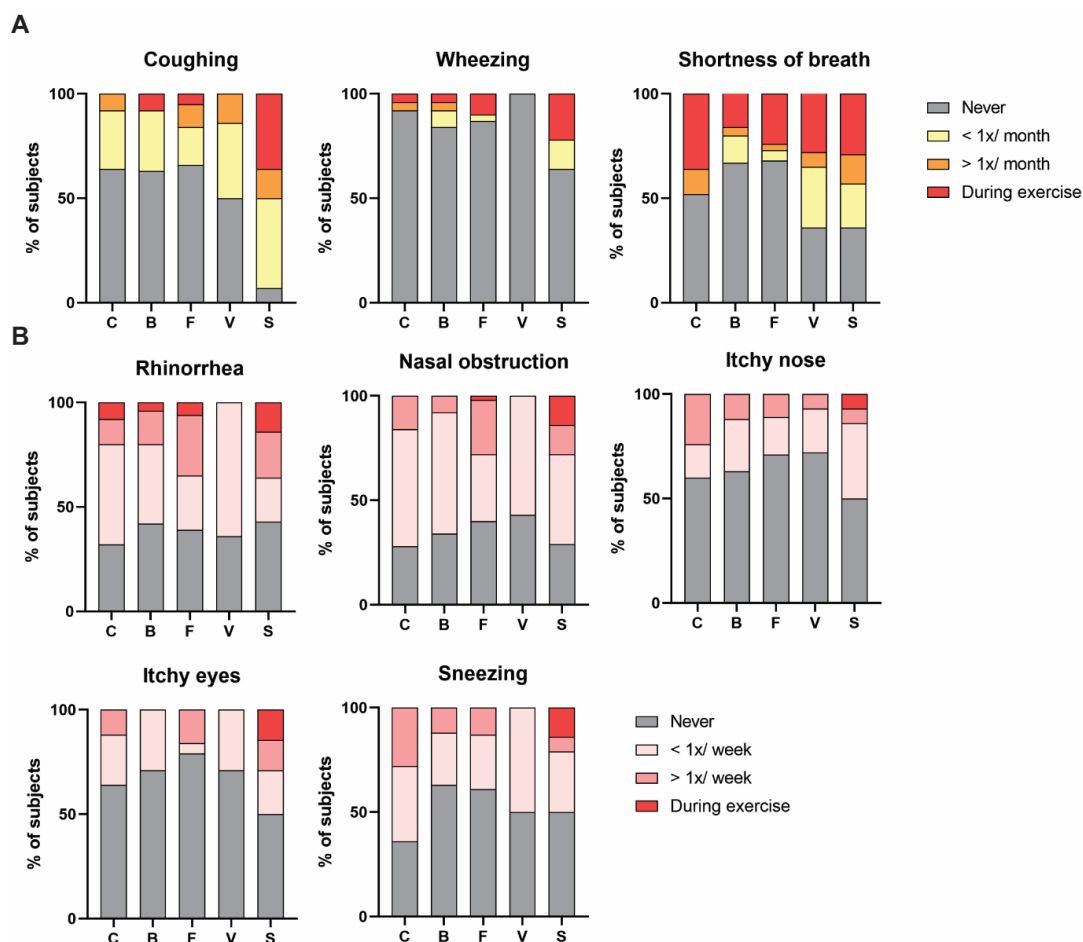

**Figure E6: Self-reported upper and lower airway symptoms**

Reported symptoms in lower (A) and upper airways (B) were evaluated via a symptom questionnaire in controls ('C', n=25) basketball ('B', n=24), football ('F', n=38), volleyball players ('V', n=14) and swimmers ('S', n=14). Data are expressed as the percentage of subjects reporting a specific symptom during exercise, >1 x/ month (or /week for the upper airways), < 1x/ month (or /week for the upper airways or never).

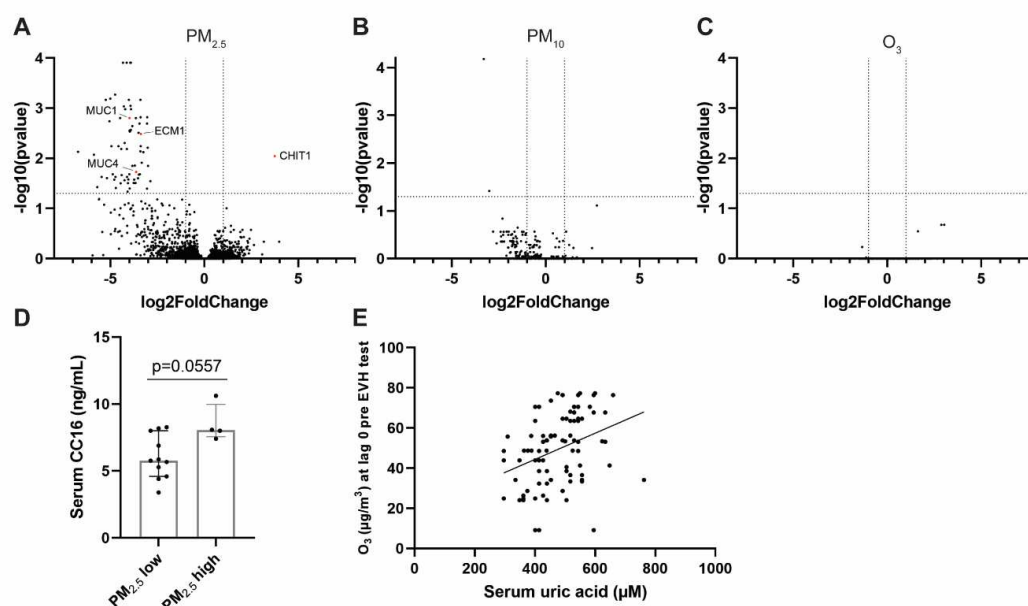

**Figure E7: Transcriptomic differences in athletes based on air pollution exposure.**

Volcano plot with the magnitude expressed as log<sub>2</sub> fold change (x axis) and significance expressed as -log<sub>10</sub> of the adjusted p value (y axis) of differential expression analysis for PM<sub>2.5</sub> low (<10 µg/m<sup>3</sup>) vs high (>25 µg/m<sup>3</sup>) (A), PM<sub>10</sub> low (<20 µg/m<sup>3</sup>) vs immediate (>20 µg/m<sup>3</sup>) (B) (no values above threshold of WHO (50 µg/m<sup>3</sup>)) and O<sub>3</sub> low (<25 µg/m<sup>3</sup>) vs immediate (O<sub>3</sub>>50 µg/m<sup>3</sup>) (C) (no values above threshold of 100 µg/m<sup>3</sup>), respectively. (D) Serum CC16 levels in athletes exposed to low PM<sub>2.5</sub> (<10 µg/m<sup>3</sup>) compared to high PM<sub>2.5</sub> (>25 µg/m<sup>3</sup>) levels. (Mann-Whitney test). (E) Correlation of serum uric acid levels with O<sub>3</sub> levels at the day of study visit. (spearman correlation).

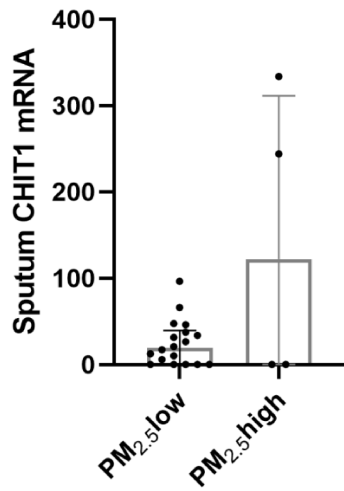

**Figure E8: Validation qPCR CHIT1**

Remaining RNA for controls athletes exposed to low PM<sub>2.5</sub> levels (<10 µg/m<sup>3</sup>) (n=18) and PM<sub>2.5</sub> high levels (>25 µg/m<sup>3</sup>) (n=4) was used to validate obtained results via qPCR. (Mann-whitney test).

## Supplementary tables

Table E1: Primer and probe sequences for qPCR

| Gene          |    | Sequence                                        |
|---------------|----|-------------------------------------------------|
| <b>CCL3</b>   | FW | 5' cct ccc ggc aga ttc cac 3'                   |
|               | RV | 5' gtt agg aag atg aca ccg ggc 3'               |
|               | TP | 5' ctg act act ttg aga cga gca gcc agt gc 3'    |
| <b>CHIT1</b>  | FW | 5' fw cct acg act tcc atg gct ctt g 3'          |
|               | RV | 5' cac agc agc atc cac gtt g 3'                 |
|               | TP | 5' cct cta caa gag gca aga aga gag tgg tgc a 3' |
| <b>CLDN15</b> | FW | 5' att ctg gcc ggt atc tgc g 3'                 |
|               | RV | 5' gcc cag ctc gta ctt ggt tc 3'                |
|               | TP | 5' atg gtg gcc atc tcc tgg tac gcc t 3'         |
| <b>RPL13a</b> | FW | 5' gac cgt gcg agg tat gct g 3'                 |
|               | RV | 5' gca cga cct tga ggg cag 3'                   |
|               | TP | 5' acc gtc tca agg tgt ttg acg gca tc 3'        |

Table E2: Top 20 genes differentially expressed controls versus athletes

| Up              | Log2fold change | Down                  | Log2fold change |
|-----------------|-----------------|-----------------------|-----------------|
| <b>HLA-DRB5</b> | 3.26            | <b>ZNF385D</b>        | -5.39           |
| <b>MLLT11</b>   | 2.81            | <b>EML1</b>           | -5.30           |
| <b>PRUNE2</b>   | 2.53            | <b>RP11-524N5.1</b>   | -5.28           |
| <b>RSAD2</b>    | 2.24            | <b>FLJ40288</b>       | -5.18           |
| <b>FOLR3</b>    | 2.12            | <b>RP1-78B3.1</b>     | -5.09           |
| <b>UBBP4</b>    | 2.07            | <b>RNA5SP378</b>      | -4.98           |
| <b>CCL3L3</b>   | 2.01            | <b>SLC28A2</b>        | -4.69           |
| <b>RNVU1-19</b> | 1.94            | <b>PISRT1</b>         | -4.55           |
| <b>HES6</b>     | 1.78            | <b>LINC01122</b>      | -4.48           |
| <b>RNU2-46P</b> | 1.77            | <b>STATH</b>          | -4.45           |
| <b>BATF2</b>    | 1.74            | <b>RP11-655M14.13</b> | -4.44           |
| <b>PLEKHG2</b>  | 1.65            | <b>HTN3</b>           | -4.38           |
| <b>SASS6</b>    | 1.57            | <b>AC079779.4</b>     | -4.35           |
| <b>BZRAP1</b>   | 1.45            | <b>RP11-68D16.1</b>   | -4.21           |
| <b>TNFAIP3</b>  | 1.29            | <b>SEZ6</b>           | -4.19           |
| <b>CCL3</b>     | 1.28            | <b>RP11-556H2.1</b>   | -4.17           |
| <b>IER3</b>     | 1.26            | <b>PAQR9-AS1</b>      | -4.08           |
| <b>GPATCH3</b>  | 1.26            | <b>FDCSP</b>          | -4.05           |
| <b>ZNF768</b>   | 1.20            | <b>FERMT1</b>         | -4.00           |
| <b>TNF</b>      | 1.18            | <b>RP11-151H2.1</b>   | -3.98           |

**Table E3: Characteristics athletes used for comparison EIB- versus EIB+ athletes**

| <b>EIB</b> | <b>Sport discipline</b> | <b>Gender</b> | <b>Age</b> | <b>Weight (kg)</b> | <b>Length (cm)</b> | <b>Atopic state</b> | <b>FeNO</b> |
|------------|-------------------------|---------------|------------|--------------------|--------------------|---------------------|-------------|
| +          | Basketball player       | M             | 15.7       | 86                 | 192                | 1                   | 11          |
| -          | Basketball player       | M             | 15.3       | 77                 | 182                | 1                   | 13          |
| -          | Football player         | M             | 14.7       | 48                 | 165                | 1                   | 11          |
| +          | Volleyball player       | F             | 18.1       | 71                 | 182                | 1                   | 166         |
| -          | Volleyball player       | F             | 18.0       | 73                 | 175                | 1                   | 17          |
| -          | Volleyball player       | F             | 17.8       | 72                 | 186                | 1                   | 14          |

Table E4: Top 20 genes differentially expressed EIB- versus EIB+

| Up                   | Log2fold change | Down            | Log2fold change |
|----------------------|-----------------|-----------------|-----------------|
| <b>RNF212B</b>       | 8.12            | <b>PRPF39</b>   | -5.49           |
| <b>RIPPLY3</b>       | 8.01            | <b>NAPSB</b>    | -4.51           |
| <b>PHOX2B</b>        | 7.95            | <b>KIF20B</b>   | -4.13           |
| <b>NPM1P30</b>       | 7.68            | <b>IGF1</b>     | -3.69           |
| <b>ONECUT2</b>       | 7.55            | <b>FTSJ3</b>    | -3.03           |
| <b>KIAA2012</b>      | 7.50            | <b>C8B</b>      | -2.74           |
| <b>GRIN2B</b>        | 7.49            | <b>HLA-DQB1</b> | -2.73           |
| <b>NR2E3</b>         | 7.46            | <b>PPTC7</b>    | -2.64           |
| <b>RP11-93G5.1</b>   | 7.44            | <b>PDCD1LG2</b> | -2.64           |
| <b>CDH4</b>          | 7.39            | <b>SCFD1</b>    | -2.62           |
| <b>RP4-671O14.7</b>  | 7.33            | <b>EIF2A</b>    | -2.38           |
| <b>IYD</b>           | 7.29            | <b>SBDS</b>     | -2.36           |
| <b>RP11-168O16.1</b> | 7.27            | <b>FILIP1L</b>  | -2.31           |
| <b>RP11-303E16.6</b> | 7.20            | <b>GINM1</b>    | -2.29           |
| <b>RP11-638L3.4</b>  | 7.20            | <b>CXCL5</b>    | -2.25           |
| <b>RP11-5A11.1</b>   | 7.14            | <b>GALNT6</b>   | -2.24           |
| <b>RP11-46D6.1</b>   | 7.09            | <b>ZNF331</b>   | -2.20           |
| <b>CTB-12A17.2</b>   | 7.08            | <b>KIAA2026</b> | -2.16           |
| <b>MTCO1P2</b>       | 6.99            | <b>MAML2</b>    | -2.13           |
| <b>HOTTIP</b>        | 6.98            | <b>ERC1</b>     | -2.06           |

**Table E5: Correlation table**

|                              | Max fall in FEV <sub>1</sub> | O <sub>3</sub> | Humidity at lag 0 | Temp at lag 0 | PM <sub>2.5</sub> at lag 3 | PM <sub>10</sub> at lag 3 | Humidity at lag 0 | Temp at lag 3 | FEV <sub>1</sub> % |
|------------------------------|------------------------------|----------------|-------------------|---------------|----------------------------|---------------------------|-------------------|---------------|--------------------|
| Max fall in FEV <sub>1</sub> | 1.000                        | -.258*         | .026              | -.072         | -.288**                    | -.291**                   | .050              | -.208         | -.079              |
| O <sub>3</sub>               | -.258*                       | 1.000          | -.230*            | .480**        | .111                       | .206                      | -.109             | .683**        | -.163              |
| Humidity at lag 0            | .026                         | -.230*         | 1.000             | -.401**       | .117                       | -.009                     | .106              | -.302**       | -.003              |
| Temp at lag 0                | -.072                        | .480**         | -.401**           | 1.000         | -.169                      | -.026                     | -.133             | .705**        | -.181              |
| PM <sub>2.5</sub> at lag 3   | -.288**                      | .111           | .117              | -.169         | 1.000                      | .955**                    | .087              | .027          | .004               |
| PM <sub>10</sub> at lag 3    | -.291**                      | .206           | -.009             | -.026         | .955**                     | 1.000                     | -.026             | .223*         | -.035              |
| Humidity at lag 3            | .050                         | -.109          | .106              | -.133         | .087                       | -.026                     | 1.000             | -.342**       | .167               |
| Temp at lag 3                | -.208                        | .683**         | -.302**           | .705**        | .027                       | .223*                     | -.342**           | 1.000         | -.198              |
| FEV <sub>1</sub> %           | -.079                        | -.163          | -.003             | -.181         | .004                       | -.035                     | .167              | -.198         | 1.000              |

Pearson correlation \* Correlation is significant at the 0.05 level (2-tailed), \*\* Correlation is significant at the 0.01 level (2-tailed).



**Table E6: Overview medication use**

|                      | <b>Basketball players (n=24)</b>      | <b>Football players (n=38)</b>                              | <b>Volleyball players (n=14)</b> | <b>Swimmers (n=14)</b>                                                                                         | <b>Controls (n=25)</b> |
|----------------------|---------------------------------------|-------------------------------------------------------------|----------------------------------|----------------------------------------------------------------------------------------------------------------|------------------------|
| <b>Allergy</b>       | Cetirizine (n=1)                      | Levocetirizine (n=1)                                        |                                  | Bilastine (n=1)                                                                                                | Cetirizine (n=1)       |
| <b>Upper airways</b> | Mometasone (n=1), nasal spray* (n=4)  | Nasal spray* (n=3)                                          |                                  | Nasal spray* (n=3)                                                                                             | Mometasone (n=1)       |
| <b>Lower airways</b> | SABA (n=1)<br>ICS (n=1**)             | SABA (n=1**, 2), LABA + ICS (n=1**),<br>Montelukast (n=1**) |                                  | SABA (n=2), LABA + ICS (n=1**, 2),<br>Montelukast (n=2), LABA + ICS +<br>Montelukast +<br>Mucolyticum (n=1**), |                        |
| <b>Others</b>        | Ibuprofen (n=1),<br>Paracetamol (n=1) | Paracetamol (n=2),<br>Ibuprofen (n=4)                       | Ivabradine (n=1)                 |                                                                                                                | Paracetamol (n=2)      |

\*Subject noted 'nasal spray' but did not know the product's name.

\*\* Subject mentioned in questionnaire to have prior diagnosis of asthma.

**Table E7: EIB+ subjects**

| Nr | Sport discipline    | Gender | Atopic state | FEV <sub>1</sub> % | FVC % | TI | Fall 1'       | Fall 5'       | Fall 10'      | Fall 15'      |
|----|---------------------|--------|--------------|--------------------|-------|----|---------------|---------------|---------------|---------------|
| 1  | Basketball player** | M      | 1            | 90                 | 109   | 72 | <b>-13.35</b> | <b>-11.01</b> | -9.84         | <b>-10.30</b> |
| 2  | Basketball player*  | M      | 1            | 108                | 108   | 86 | -6.36         | <b>-13.68</b> | -7.51         | -5.97         |
| 3  | Football player     | F      | 0            | 104                | 114   | 81 | -0.65         | <b>-12.94</b> | <b>-15.53</b> | -1.29         |
| 4  | Football player     | M      | 0            | 108                | 110   | 85 | -2.54         | <b>-27.23</b> | <b>-26.49</b> | -1.49         |
| 5  | Volleyball player*  | F      | 1            | 118                | 117   | 88 | <b>-10.47</b> | <b>-14.96</b> | <b>-15.38</b> | <b>-11.11</b> |
| 6  | Swimmer             | M      | 0            | 104                | 133   | 68 | -9.77         | <b>-11.23</b> | <b>-10.60</b> | <b>-10.19</b> |
| 7  | Swimmer             | M      | 0            | 120                | 133   | 78 | -6.36         | <b>-12.71</b> | <b>-12.92</b> | -8.47         |
| 8  | Swimmer**           | F      | 0            | 119                | 134   | 79 | <b>-16.58</b> | <b>-12.03</b> | -7.75         | -8.02         |
| 9  | Control             | F      | 1            | 111                | 118   | 78 | <b>-15.74</b> | <b>-23.15</b> | <b>-19.14</b> | <b>-13.58</b> |
| 10 | Control             | M      | 1            | 105                | 96    | 90 | -3.85         | -9.19         | -9.19         | <b>-12.61</b> |
| 11 | Control             | M      | 0            | 115                | 108   | 90 | -4.00         | -4.75         | -7.00         | <b>-10.25</b> |

Maximal fall in FEV<sub>1</sub> after the EVH test at different time points in EIB+ young elite athletes.

\*Sputum samples of indicated athletes were used for RNA-Seq analysis.

\*\* Subject mentioned in questionnaire to have prior diagnosis of asthma

**Table E8: Differential expression analysis between sport disciplines**

| <b>Gene name</b>                            | <b>Log2Foldchange</b> | <b>P adjusted</b> |
|---------------------------------------------|-----------------------|-------------------|
| <i>Basketball versus football players</i>   |                       |                   |
| HELLPAR                                     | -2.6                  | 0.003663          |
| RP11-356K23.1                               | 1.9                   | 0.146214          |
| CFAP45                                      | -2.7                  | 0.197004          |
| TTC25                                       | -1.9                  | 0.197004          |
| NR2F2                                       | 0.6                   | 0.267105          |
| HYDIN2                                      | -1.2                  | 0.2999            |
| MIF                                         | -2.9                  | 0.2999            |
| C9orf24                                     | 0.7                   | 0.314153          |
| <i>Basketball versus volleyball players</i> |                       |                   |
| RPS14                                       | -0.6                  | 0.074010726       |
| CIRBP                                       | -0.4                  | 0.07984527        |
| LAMTOR4                                     | -0.6                  | 0.07984527        |
| Metazoa_SRP                                 | -2.5                  | 0.07984527        |
| SLC37A1                                     | 0.9                   | 0.07984527        |
| MT-TT                                       | -1.5                  | 0.090845219       |
| RSAD2                                       | 2.1                   | 0.090845219       |
| SMIM3                                       | -1.4                  | 0.090845219       |
| TGM3                                        | -2.4                  | 0.090845219       |
| APOE                                        | -1.2                  | 0.095427481       |
| <i>Football versus volleyball players</i>   |                       |                   |
| KIAA1551                                    | 0.9                   | 0.180642019       |
| RP11-1143G9.4                               | -5.8                  | 0.196325744       |
| FTH1P3                                      | -2.1                  | 0.258028139       |
| AHNAK                                       | -0.8                  | 0.272184731       |
| SAA1                                        | 3.2                   | 0.293974195       |
| MTCYBP18                                    | -3.6                  | 0.606428123       |
| FTH1P1                                      | -3.1                  | 0.677932845       |
| PKN2                                        | 0.7                   | 0.677932845       |
| RPS18                                       | -0.6                  | 0.677932845       |

Top 10 significantly\_differentially\_expressed genes ordered by adjusted p-value.

**Table E9: Top 20 genes differentially expressed PM<sub>2.5</sub> low exposure (<10 µg/m<sup>3</sup>) versus PM<sub>2.5</sub> high exposure (>25 µg/m<sup>3</sup>)**

| Up    | Log2fold change | Down     | Log2fold change |
|-------|-----------------|----------|-----------------|
| CHIT1 | 3.74            | VSIG2    | -6.73           |
|       |                 | ATP12A   | -5.88           |
|       |                 | RPTN     | -5.70           |
|       |                 | KRT15    | -5.47           |
|       |                 | PSCA     | -5.25           |
|       |                 | TRNP1    | -5.19           |
|       |                 | CEACAM5  | -5.06           |
|       |                 | S100A16  | -5.01           |
|       |                 | FUT3     | -4.94           |
|       |                 | ALDH1A3  | -4.87           |
|       |                 | CTGF     | -4.80           |
|       |                 | TMPRSS2  | -4.75           |
|       |                 | AIF1L    | -4.73           |
|       |                 | FCGBP    | -4.72           |
|       |                 | AQP5     | -4.58           |
|       |                 | S100A14  | -4.48           |
|       |                 | PDZK1IP1 | -4.46           |
|       |                 | S100A7   | -4.42           |
|       |                 | PRSS8    | -4.40           |
|       |                 | NDRG2    | -4.34           |

## References

- 1 Seys SF, Hox V, Van Gerven L, *et al.* Damage-associated molecular pattern and innate cytokine release in the airways of competitive swimmers. *Allergy* 2015;70:187–94. doi:10.1111/all.12540
- 2 Seys SF, Daenen M, Dilissen E, *et al.* Effects of high altitude and cold air exposure on airway inflammation in patients with asthma. *Thorax* 2013;68:906–13. doi:10.1136/thoraxjnl-2013-203280
- 3 Seys SF, Grabowski M, Adriaensen W, *et al.* Sputum cytokine mapping reveals an ‘IL-5, IL-17A, IL-25-high’ pattern associated with poorly controlled asthma. *Clin Exp Allergy* 2013;43:1009–17. doi:10.1111/cea.12125
- 4 Bullens DMA, Truyen E, Coteur L, *et al.* IL-17 mRNA in sputum of asthmatic patients: Linking T cell driven inflammation and granulocytic influx? *Respir Res* 2006;7:135. doi:10.1186/1465-9921-7-135
- 5 Truyen E, Coteur L, Dilissen E, *et al.* Evaluation of airway inflammation by quantitative Th1/Th2 cytokine mRNA measurement in sputum of asthma patients. *Thorax* 2006;61:202–8. doi:10.1136/thx.2005.052399
- 6 Xie F, Xiao P, Chen D, *et al.* miRDeepFinder: a miRNA analysis tool for deep sequencing of plant small RNAs. doi:10.1007/s11103-012-9885-2
- 7 Giulietti A, Overbergh L, Valckx D, *et al.* An overview of real-time quantitative PCR: applications to quantify cytokine gene expression. *Methods* 2001;25:386–401. doi:10.1006/meth.2001.1261
- 8 Aronesty E. Command-line tools for processing biological sequencing data. *ea-utils* Published Online First: 2011. <https://github.com/ExpressionAnalysis/ea-utils>
- 9 Li H, Handsaker B, Wysoker A, *et al.* The Sequence Alignment/Map format and SAMtools. *Bioinformatics* 2009;25:2078. doi:10.1093/BIOINFORMATICS/BTP352
- 10 Love MI, Huber W, Anders S. Moderated estimation of fold change and dispersion for RNA-seq data with DESeq2. *Genome Biol* 2014;15. doi:10.1186/S13059-014-0550-8
- 11 Jonckheere A-C, Seys S, Dilissen E, *et al.* Early-onset airway damage in early-career elite athletes: A risk factor for exercise-induced bronchoconstriction. *J Allergy Clin Immunol* Published Online First: 26 July 2019. doi:10.1016/J.JACI.2019.07.014
- 12 Liu T, Zhang L, Joo D, *et al.* NF-κB signaling in inflammation. *Signal Transduct Target Ther* 2017;2:17023. doi:10.1038/sigtrans.2017.23
- 13 Hadžović-Džuvo A, Valjevac A, Lepara O, *et al.* Oxidative stress status in elite athletes engaged in different sport disciplines. *Bosn J Basic Med Sci* 2014;14:56. doi:10.17305/BJBMS.2014.2262
- 14 Couto M, Kurowski M, Moreira A, *et al.* Mechanisms of exercise-induced bronchoconstriction in athletes: Current perspectives and future challenges. *Allergy* 2018;73:8–16. doi:10.1111/all.13224
